# Supplementary material for: Risk and protective factors associated with gang affiliation among high-risk youth: a public health approach
Source: PubMed Central journal article supplement — Inj Prev. 2012 Jan 11;18(4):253–8. doi: 10.1136/injuryprev-2011-040083 (PMC3406611; doi:10.1136/injuryprev-2011-040083), 2012-01-11
Supplement: injuryprev-2011-040083-s1.pdf [file injuryprev-2011-040083-s1.pdf]

APPENDIX A. Description of Variables  
(Web Only File)
